# Supplementary material for: Genetic and genomic analysis for cocoon yield traits in silkworm
Source: PubMed Central journal article supplement (PMC7105477; doi:10.1038/s41598-020-62507-9), 2020-03-30
Supplement: 41598_2020_62507_MOESM1_ESM.pdf [file 41598_2020_62507_MOESM1_ESM.pdf]

## Supplementary information

### Genetic and genomic analysis for cocoon yield traits in silkworm

Shou-Min Fang<sup>1,2</sup>, Qiu-Zhong Zhou<sup>1</sup>, Quan-You Yu<sup>1,\*</sup>, Ze Zhang<sup>1</sup>

<sup>1</sup>School of Life Sciences, Chongqing University, Chongqing 401331, China.

<sup>2</sup>College of Life Science, China West Normal University, Nanchong 637002, China.

\*Corresponding authors: yuqy@cqu.edu.cn

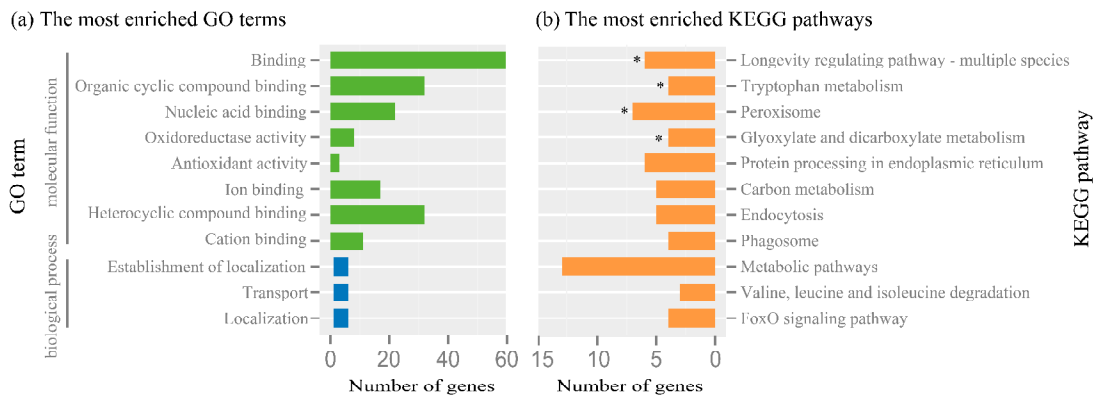

**Supplementary Fig. S1** The most enriched Gene Ontology and KEGG categories of the expressed genes within QTL regions. (a) The most enriched GO terms. (b) The most enriched KEGG pathways. \* $P < 0.05$ , significantly enriched categories.

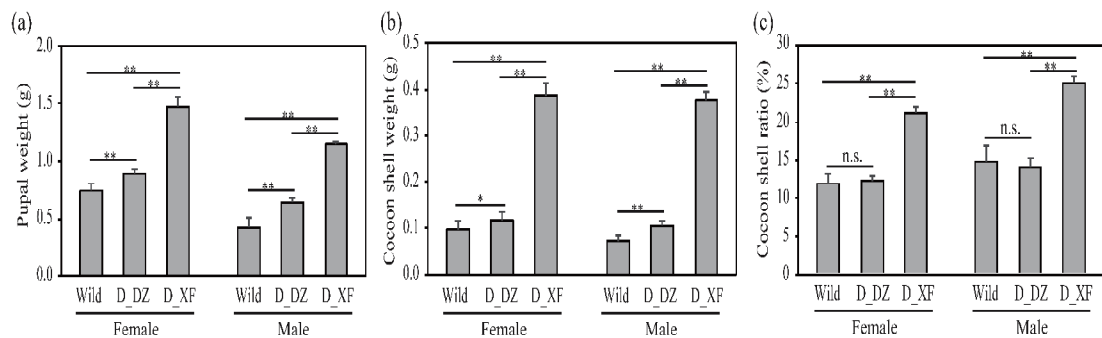

**Supplementary Fig. S2** Comparison of cocoon yield traits in the domestic and wild silkworms used for qPCR validation. (a) Comparison of pupal weight. (b) Cocoon shell weight. (c) Cocoon shell ratio.

shell ratio. One-way analysis of variance (ANOVA) was used to determine significant differences between any two samples. \* $P < 0.05$ ; \*\* $P < 0.01$ ; n.s.: not significant.

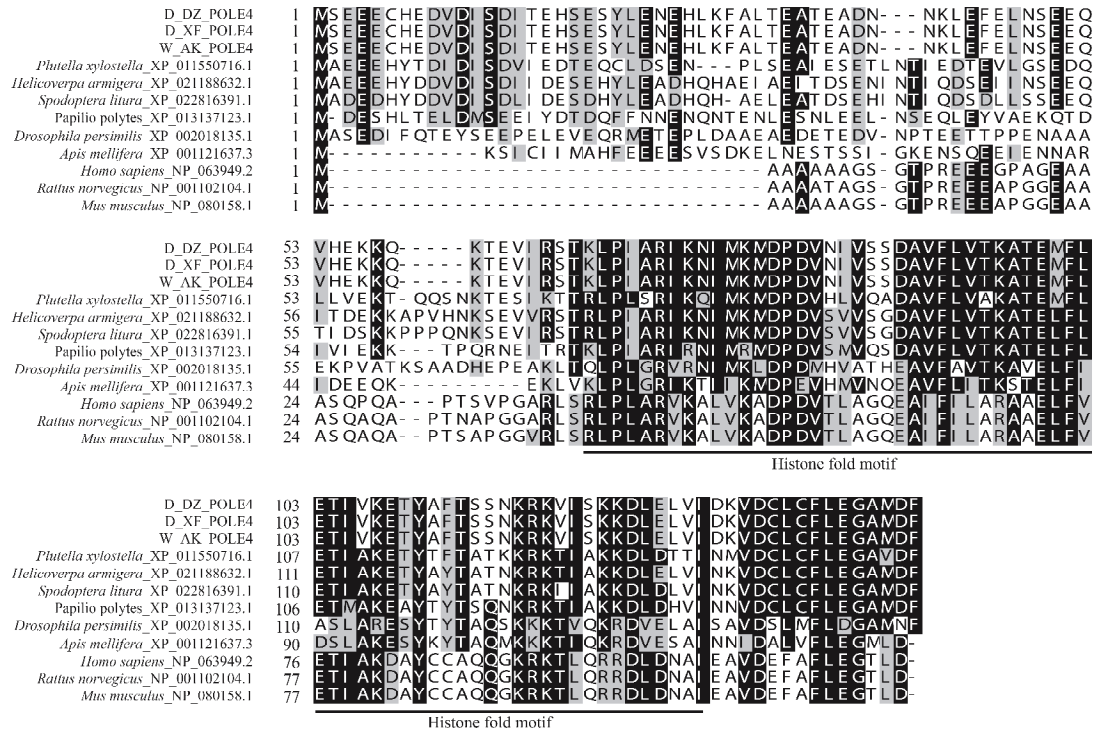

**Supplementary Fig. S3 Alignment of the amino acid sequences of DNA polymerase epsilon subunit 4 (POLE4).** POLE4 sequences of the other species were retrieved from GenBank (<https://www.ncbi.nlm.nih.gov/>). Residues in black boxes indicate sequence identity. Residues in grey boxes indicate conservative substitutions. The conserved histone fold motif is underlined.

**Supplementary Table S1 Sequencing information for each individual used for QTL mapping.**

| Samples | Raw reads | Raw Base (bp) | Clean Base (bp) | Error Rate (%) | Q20 (%)      | Q30 (%)      | GC content (%) |
|---------|-----------|---------------|-----------------|----------------|--------------|--------------|----------------|
| BC1-01  | 3,029,964 | 605,992,800   | 550,050,800     | 0.03, 0.03     | 98.47, 96.91 | 94.37, 91.98 | 38.83, 39.02   |
| BC1-02  | 3,715,760 | 743,152,000   | 707,035,000     | 0.03, 0.03     | 98.05, 96.06 | 93.49, 90.85 | 35.98, 36.20   |
| BC1-03  | 4,566,401 | 913,280,200   | 874,589,000     | 0.03, 0.03     | 97.64, 96.30 | 92.28, 90.72 | 35.27, 35.72   |
| BC1-04  | 4,565,707 | 913,141,400   | 870,893,400     | 0.03, 0.03     | 97.61, 96.23 | 92.26, 90.63 | 35.28, 35.71   |
| BC1-05  | 3,116,172 | 623,234,400   | 596,583,400     | 0.03, 0.03     | 98.03, 96.01 | 93.42, 90.72 | 35.94, 36.11   |
| BC1-06  | 2,284,044 | 456,808,800   | 431,993,200     | 0.03, 0.03     | 97.72, 96.50 | 92.54, 91.17 | 35.35, 35.72   |
| BC1-07  | 2,943,778 | 588,755,600   | 558,651,600     | 0.03, 0.03     | 98.08, 96.10 | 93.57, 90.95 | 35.89, 36.06   |
| BC1-08  | 2,189,077 | 437,815,400   | 417,281,800     | 0.03, 0.03     | 97.62, 96.23 | 92.29, 90.61 | 35.31, 35.75   |
| BC1-09  | 2,344,602 | 468,920,400   | 449,631,200     | 0.03, 0.03     | 97.63, 96.34 | 92.33, 90.83 | 35.25, 35.64   |
| BC1-10  | 4,135,127 | 827,025,400   | 790,799,200     | 0.03, 0.03     | 98.01, 96.30 | 93.34, 90.93 | 35.15, 35.72   |
| BC1-11  | 4,721,200 | 944,240,000   | 890,263,400     | 0.03, 0.03     | 97.67, 96.52 | 92.45, 91.25 | 35.29, 35.66   |
| BC1-12  | 2,462,085 | 492,417,000   | 468,693,600     | 0.03, 0.03     | 98.06, 96.03 | 93.51, 90.80 | 35.96, 36.20   |

|        |           |               |               |            |              |              |              |
|--------|-----------|---------------|---------------|------------|--------------|--------------|--------------|
| BC1-13 | 3,595,973 | 719,194,600   | 689,947,000   | 0.03, 0.03 | 97.71, 96.43 | 92.54, 91.07 | 35.27, 35.71 |
| BC1-14 | 3,124,951 | 624,990,200   | 593,231,600   | 0.03, 0.03 | 97.66, 96.29 | 92.41, 90.79 | 35.18, 35.53 |
| BC1-15 | 3,239,815 | 647,963,000   | 609,687,800   | 0.03, 0.03 | 97.76, 96.57 | 92.70, 91.40 | 35.30, 35.55 |
| BC1-16 | 4,683,450 | 936,690,000   | 891,612,800   | 0.03, 0.03 | 97.68, 96.37 | 92.42, 90.91 | 35.28, 35.67 |
| BC1-17 | 2,581,952 | 516,390,400   | 483,250,600   | 0.03, 0.03 | 98.08, 96.15 | 93.61, 91.14 | 35.98, 36.06 |
| BC1-18 | 2,475,535 | 495,107,000   | 474,183,800   | 0.03, 0.03 | 97.71, 96.33 | 92.52, 90.83 | 35.22, 35.60 |
| BC1-19 | 3,302,630 | 660,526,000   | 628,866,800   | 0.03, 0.03 | 97.73, 96.20 | 92.53, 90.55 | 35.21, 35.60 |
| BC1-20 | 2,946,991 | 589,398,200   | 564,049,000   | 0.03, 0.03 | 97.73, 96.33 | 92.54, 90.82 | 35.19, 35.57 |
| BC1-21 | 1,950,248 | 390,049,600   | 373,455,400   | 0.03, 0.03 | 97.57, 96.13 | 92.13, 90.40 | 35.20, 35.58 |
| BC1-22 | 2,172,696 | 434,539,200   | 403,072,600   | 0.03, 0.04 | 97.88, 95.52 | 92.83, 89.01 | 36.26, 36.15 |
| BC1-23 | 3,192,618 | 638,523,600   | 599,088,200   | 0.03, 0.03 | 98.10, 96.47 | 93.56, 91.32 | 35.23, 35.48 |
| BC1-24 | 1,970,093 | 394,018,600   | 374,822,000   | 0.03, 0.03 | 98.06, 96.01 | 93.53, 90.77 | 35.93, 36.12 |
| BC1-25 | 3,319,169 | 663,833,800   | 629,454,400   | 0.03, 0.03 | 97.97, 96.22 | 93.23, 90.77 | 35.15, 35.54 |
| BC1-26 | 3,488,015 | 697,603,000   | 664,074,000   | 0.03, 0.03 | 97.95, 96.38 | 93.18, 91.06 | 35.22, 35.62 |
| BC1-27 | 3,173,526 | 634,705,200   | 589,454,200   | 0.03, 0.03 | 98.06, 96.23 | 93.53, 91.22 | 35.99, 36.14 |
| BC1-28 | 2,669,551 | 533,910,200   | 506,790,000   | 0.03, 0.03 | 98.07, 96.09 | 93.53, 90.93 | 35.97, 36.09 |
| BC1-29 | 2,404,942 | 480,988,400   | 454,385,000   | 0.03, 0.04 | 97.83, 95.28 | 92.64, 88.53 | 36.33, 36.11 |
| BC1-30 | 1,861,207 | 372,241,400   | 354,640,800   | 0.03, 0.03 | 98.05, 95.95 | 93.46, 90.62 | 35.92, 36.16 |
| BC1-31 | 2,847,177 | 569,435,400   | 533,344,000   | 0.03, 0.04 | 97.79, 95.67 | 92.56, 89.27 | 36.44, 36.13 |
| BC1-32 | 2,431,865 | 486,373,000   | 460,549,400   | 0.03, 0.04 | 97.87, 95.55 | 92.76, 89.06 | 36.28, 36.08 |
| BC1-33 | 3,930,066 | 786,013,200   | 735,700,400   | 0.02, 0.03 | 98.59, 96.95 | 94.77, 92.10 | 35.55, 35.84 |
| BC1-34 | 3,266,601 | 653,320,200   | 617,745,400   | 0.03, 0.04 | 97.84, 95.25 | 92.63, 88.48 | 36.32, 36.07 |
| BC1-35 | 2,825,310 | 565,062,000   | 519,599,800   | 0.03, 0.04 | 97.74, 95.61 | 92.42, 89.14 | 36.52, 36.10 |
| BC1-36 | 2,068,260 | 413,652,000   | 393,306,800   | 0.03, 0.03 | 97.96, 96.00 | 93.35, 90.76 | 35.92, 36.13 |
| BC1-37 | 4,213,810 | 842,762,000   | 798,597,600   | 0.03, 0.04 | 97.84, 95.32 | 92.62, 88.58 | 36.31, 36.09 |
| BC1-38 | 2,554,699 | 510,939,800   | 483,139,600   | 0.03, 0.04 | 97.87, 95.30 | 92.73, 88.57 | 36.21, 36.02 |
| BC1-39 | 3,238,514 | 647,702,800   | 611,013,000   | 0.03, 0.04 | 97.83, 95.41 | 92.63, 88.78 | 36.31, 36.11 |
| BC1-40 | 4,981,481 | 996,296,200   | 929,391,200   | 0.02, 0.03 | 98.56, 97.07 | 94.71, 92.38 | 35.47, 35.75 |
| BC1-41 | 2,281,094 | 456,218,800   | 430,134,800   | 0.03, 0.04 | 97.84, 95.37 | 92.66, 88.71 | 36.61, 36.38 |
| BC1-42 | 3,308,211 | 661,642,200   | 627,585,200   | 0.03, 0.04 | 97.87, 95.47 | 92.75, 88.90 | 36.32, 36.05 |
| BC1-43 | 3,701,277 | 740,255,400   | 702,500,000   | 0.03, 0.04 | 97.87, 95.55 | 92.76, 89.05 | 36.51, 36.09 |
| BC1-44 | 1,686,991 | 337,398,200   | 319,094,000   | 0.03, 0.03 | 98.05, 96.08 | 93.50, 90.92 | 35.89, 36.16 |
| BC1-45 | 2,923,021 | 584,604,200   | 539,817,400   | 0.03, 0.03 | 98.09, 96.34 | 93.64, 91.47 | 36.36, 36.42 |
| BC1-46 | 2,741,787 | 548,357,400   | 518,179,000   | 0.02, 0.03 | 98.46, 96.76 | 94.39, 91.67 | 35.47, 35.74 |
| BC1-47 | 3,659,906 | 731,981,200   | 699,942,000   | 0.03, 0.03 | 98.03, 95.98 | 93.45, 90.69 | 35.93, 36.13 |
| BC1-48 | 5,150,703 | 1,030,140,600 | 981,018,800   | 0.03, 0.03 | 97.99, 96.34 | 93.28, 90.99 | 35.19, 35.67 |
| BC1-49 | 6,198,718 | 1,239,743,600 | 1,189,449,800 | 0.03, 0.03 | 97.98, 96.32 | 93.26, 90.95 | 35.14, 35.61 |

|        |           |               |             |            |              |              |              |
|--------|-----------|---------------|-------------|------------|--------------|--------------|--------------|
| BC1-50 | 1,456,518 | 291,303,600   | 275,627,000 | 0.03, 0.04 | 97.83, 95.39 | 92.63, 88.72 | 36.40, 36.15 |
| BC1-51 | 5,230,696 | 1,046,139,200 | 960,263,800 | 0.02, 0.03 | 98.53, 97.17 | 94.62, 92.56 | 37.27, 37.34 |
| BC1-52 | 1,977,722 | 395,544,400   | 376,768,600 | 0.03, 0.03 | 97.98, 96.19 | 93.24, 90.71 | 35.12, 35.57 |
| BC1-53 | 2,182,526 | 436,505,200   | 411,280,400 | 0.03, 0.03 | 98.07, 96.03 | 93.57, 90.84 | 35.86, 36.05 |
| BC1-54 | 2,559,490 | 511,898,000   | 484,473,400 | 0.03, 0.03 | 97.99, 96.41 | 93.31, 91.14 | 35.20, 35.65 |
| BC1-55 | 1,648,414 | 329,682,800   | 312,721,200 | 0.03, 0.03 | 98.09, 96.12 | 93.61, 91.00 | 35.91, 36.08 |
| BC1-56 | 4,821,349 | 964,269,800   | 912,911,200 | 0.02, 0.03 | 98.57, 96.99 | 94.73, 92.20 | 35.40, 35.75 |
| BC1-57 | 3,154,160 | 630,832,000   | 589,835,200 | 0.03, 0.03 | 98.06, 96.67 | 93.53, 91.75 | 35.32, 35.62 |
| BC1-58 | 2,619,113 | 523,822,600   | 498,863,800 | 0.03, 0.03 | 98.02, 96.45 | 93.39, 91.22 | 35.23, 35.64 |
| BC1-59 | 1,968,901 | 393,780,200   | 375,619,400 | 0.03, 0.03 | 97.94, 96.19 | 93.10, 90.68 | 35.14, 35.62 |
| BC1-60 | 2,297,267 | 459,453,400   | 434,883,400 | 0.03, 0.03 | 98.01, 96.39 | 93.33, 91.13 | 35.12, 35.53 |
| BC1-61 | 3,318,737 | 663,747,400   | 634,808,600 | 0.03, 0.03 | 97.96, 96.12 | 93.16, 90.55 | 35.17, 35.67 |
| BC1-62 | 3,691,185 | 738,237,000   | 703,473,200 | 0.03, 0.03 | 98.04, 95.98 | 93.43, 90.67 | 36.00, 36.21 |
| BC1-63 | 2,986,348 | 597,269,600   | 551,041,800 | 0.03, 0.04 | 97.66, 95.72 | 92.42, 89.62 | 35.18, 35.46 |
| BC1-64 | 4,139,319 | 827,863,800   | 792,049,000 | 0.03, 0.03 | 97.96, 96.20 | 93.18, 90.73 | 35.21, 35.72 |
| BC1-65 | 1,885,225 | 377,045,000   | 357,928,200 | 0.03, 0.03 | 97.96, 96.33 | 93.22, 90.98 | 35.46, 35.92 |
| BC1-66 | 2,461,267 | 492,253,400   | 448,516,200 | 0.03, 0.04 | 97.68, 95.69 | 92.46, 89.58 | 35.23, 35.50 |
| BC1-67 | 3,034,431 | 606,886,200   | 542,127,200 | 0.03, 0.04 | 97.61, 95.58 | 92.33, 89.36 | 35.35, 35.59 |
| BC1-68 | 4,826,169 | 965,233,800   | 924,044,200 | 0.03, 0.03 | 97.99, 96.18 | 93.28, 90.69 | 35.26, 35.67 |
| BC1-69 | 2,704,923 | 540,984,600   | 477,327,600 | 0.04, 0.05 | 96.67, 94.57 | 90.11, 86.86 | 40.26, 40.07 |
| BC1-70 | 2,839,618 | 567,923,600   | 539,386,800 | 0.03, 0.03 | 98.06, 95.99 | 93.51, 90.72 | 35.99, 36.19 |
| BC1-71 | 2,540,514 | 508,102,800   | 480,115,400 | 0.03, 0.03 | 98.08, 96.00 | 93.56, 90.76 | 35.83, 36.09 |
| BC1-72 | 2,664,270 | 532,854,000   | 486,096,400 | 0.03, 0.04 | 97.90, 95.75 | 92.98, 89.57 | 35.37, 35.57 |
| BC1-73 | 2,498,274 | 499,654,800   | 452,270,600 | 0.03, 0.04 | 97.83, 95.66 | 92.81, 89.41 | 35.39, 35.57 |
| BC1-74 | 2,822,794 | 564,558,800   | 509,343,400 | 0.03, 0.03 | 97.85, 95.80 | 92.90, 89.69 | 35.41, 35.53 |
| BC1-75 | 2,363,552 | 472,710,400   | 434,048,200 | 0.03, 0.03 | 97.94, 95.99 | 93.09, 90.03 | 35.50, 35.63 |
| BC1-76 | 3,137,934 | 627,586,800   | 597,509,000 | 0.02, 0.03 | 98.53, 96.66 | 94.55, 91.46 | 35.53, 35.85 |
| BC1-77 | 2,112,068 | 422,413,600   | 400,937,200 | 0.03, 0.03 | 97.93, 96.09 | 93.11, 90.50 | 35.17, 35.63 |
| BC1-78 | 2,641,358 | 528,271,600   | 488,658,800 | 0.03, 0.04 | 97.52, 95.85 | 92.03, 89.74 | 35.25, 35.56 |
| BC1-79 | 2,350,012 | 470,002,400   | 425,754,600 | 0.03, 0.03 | 97.90, 95.93 | 92.97, 89.90 | 35.24, 35.44 |
| BC1-80 | 2,900,656 | 580,131,200   | 554,021,000 | 0.02, 0.03 | 98.56, 96.67 | 94.65, 91.46 | 35.49, 35.90 |
| BC1-81 | 2,483,855 | 496,771,000   | 469,363,600 | 0.03, 0.03 | 98.01, 95.96 | 93.42, 90.70 | 35.98, 36.21 |
| BC1-82 | 2,899,078 | 579,815,600   | 529,730,000 | 0.03, 0.04 | 97.81, 95.70 | 92.77, 89.42 | 35.44, 35.60 |
| BC1-83 | 3,309,100 | 661,820,000   | 628,552,000 | 0.02, 0.03 | 98.56, 96.86 | 94.67, 91.89 | 35.29, 35.76 |
| BC1-84 | 2,747,751 | 549,550,200   | 506,588,400 | 0.03, 0.04 | 97.45, 95.71 | 91.86, 89.50 | 35.26, 35.52 |
| BC1-85 | 2,339,004 | 467,800,800   | 442,924,800 | 0.02, 0.03 | 98.56, 96.89 | 94.71, 92.00 | 35.26, 35.56 |
| BC1-86 | 1,874,873 | 374,974,600   | 349,341,000 | 0.02, 0.03 | 98.55, 96.82 | 94.66, 91.87 | 35.38, 35.68 |

|         |           |             |             |            |              |              |              |
|---------|-----------|-------------|-------------|------------|--------------|--------------|--------------|
| BC1-87  | 2,727,560 | 545,512,000 | 480,951,000 | 0.03, 0.04 | 97.43, 95.47 | 91.82, 89.09 | 35.31, 35.58 |
| BC1-88  | 3,613,318 | 722,663,600 | 663,979,200 | 0.03, 0.03 | 97.88, 95.99 | 92.98, 90.05 | 35.56, 35.61 |
| BC1-89  | 2,939,256 | 587,851,200 | 527,690,000 | 0.03, 0.03 | 97.50, 95.81 | 91.98, 89.75 | 35.26, 35.47 |
| BC1-90  | 3,034,116 | 606,823,200 | 579,153,000 | 0.03, 0.03 | 97.66, 96.35 | 92.43, 90.89 | 35.16, 35.54 |
| BC1-91  | 4,413,807 | 882,761,400 | 823,245,600 | 0.02, 0.03 | 98.55, 96.95 | 94.63, 92.09 | 35.71, 35.81 |
| BC1-92  | 3,237,889 | 647,577,800 | 621,754,600 | 0.03, 0.03 | 97.68, 96.21 | 92.43, 90.58 | 35.25, 35.67 |
| BC1-93  | 2,463,576 | 492,715,200 | 469,785,400 | 0.03, 0.03 | 98.00, 95.92 | 93.32, 90.54 | 35.93, 36.17 |
| BC1-94  | 1,191,600 | 238,320,000 | 223,133,000 | 0.03, 0.04 | 97.86, 95.43 | 92.77, 88.83 | 36.04, 35.94 |
| BC1-95  | 1,758,280 | 351,656,000 | 331,379,800 | 0.03, 0.04 | 97.84, 95.24 | 92.65, 88.47 | 36.21, 36.06 |
| BC1-96  | 1,597,867 | 319,573,400 | 301,277,800 | 0.03, 0.04 | 97.87, 95.40 | 92.76, 88.80 | 36.18, 36.04 |
| BC1-97  | 996,907   | 199,381,400 | 187,044,600 | 0.03, 0.04 | 97.85, 95.49 | 92.72, 88.95 | 35.99, 35.82 |
| BC1-98  | 1,720,482 | 344,096,400 | 324,761,600 | 0.03, 0.04 | 97.80, 95.43 | 92.60, 88.81 | 36.34, 36.21 |
| BC1-99  | 1,317,766 | 263,553,200 | 246,952,200 | 0.03, 0.04 | 97.78, 95.45 | 92.54, 88.86 | 36.19, 36.07 |
| BC1-100 | 1,562,683 | 312,536,600 | 293,527,800 | 0.03, 0.04 | 97.77, 95.22 | 92.48, 88.40 | 36.27, 36.13 |

**Supplementary Table S2 Clean reads and information mapped to the silkworm reference genome.**

| <b>Samples</b> | <b>Clean read pairs</b> | <b>Rmduped read pairs</b> | <b>Read pairs with <i>EcoR I</i> recognition site</b> |
|----------------|-------------------------|---------------------------|-------------------------------------------------------|
| BC1-01         | 2,750,254               | 2,253,984                 | 1,756,259                                             |
| BC1-02         | 3,535,175               | 3,142,940                 | 3,048,095                                             |
| BC1-03         | 4,372,945               | 3,604,111                 | 3,436,064                                             |
| BC1-04         | 4,354,467               | 3,614,138                 | 3,435,684                                             |
| BC1-05         | 2,982,917               | 2,670,419                 | 2,600,061                                             |
| BC1-06         | 2,159,966               | 1,826,624                 | 1,670,383                                             |
| BC1-07         | 2,793,258               | 2,527,593                 | 2,452,116                                             |
| BC1-08         | 2,086,409               | 1,750,856                 | 1,648,481                                             |
| BC1-09         | 2,248,156               | 1,901,017                 | 1,831,631                                             |
| BC1-10         | 3,953,996               | 3,236,053                 | 3,095,367                                             |
| BC1-11         | 4,451,317               | 3,666,882                 | 3,374,176                                             |
| BC1-12         | 2,343,468               | 2,118,902                 | 2,031,669                                             |
| BC1-13         | 3,449,735               | 2,892,134                 | 2,769,883                                             |
| BC1-14         | 2,966,158               | 2,480,678                 | 2,337,614                                             |
| BC1-15         | 3,048,439               | 2,573,614                 | 2,336,017                                             |
| BC1-16         | 4,458,064               | 3,680,139                 | 3,477,094                                             |
| BC1-17         | 2,416,253               | 2,187,258                 | 2,055,459                                             |
| BC1-18         | 2,370,919               | 2,001,754                 | 1,911,965                                             |
| BC1-19         | 3,144,334               | 2,625,140                 | 2,470,844                                             |

|        |           |           |           |
|--------|-----------|-----------|-----------|
| BC1-20 | 2,820,245 | 2,355,718 | 2,224,899 |
| BC1-21 | 1,867,277 | 1,579,636 | 1,499,325 |
| BC1-22 | 2,015,363 | 1,915,608 | 1,725,159 |
| BC1-23 | 2,995,441 | 2,405,817 | 2,173,774 |
| BC1-24 | 1,874,110 | 1,704,664 | 1,634,822 |
| BC1-25 | 3,147,272 | 2,581,958 | 2,434,617 |
| BC1-26 | 3,320,370 | 2,735,017 | 2,584,636 |
| BC1-27 | 2,947,271 | 2,658,707 | 2,398,572 |
| BC1-28 | 2,533,950 | 2,296,831 | 2,223,443 |
| BC1-29 | 2,271,925 | 2,165,587 | 2,003,192 |
| BC1-30 | 1,773,204 | 1,617,871 | 1,558,686 |
| BC1-31 | 2,666,720 | 2,552,156 | 2,413,818 |
| BC1-32 | 2,302,747 | 2,193,029 | 1,988,256 |
| BC1-33 | 3,678,502 | 3,087,709 | 2,746,471 |
| BC1-34 | 3,088,727 | 2,947,380 | 2,844,396 |
| BC1-35 | 2,597,999 | 2,499,517 | 2,262,086 |
| BC1-36 | 1,966,534 | 1,783,223 | 1,707,882 |
| BC1-37 | 3,992,988 | 3,780,839 | 3,620,002 |
| BC1-38 | 2,415,698 | 2,295,880 | 2,158,098 |
| BC1-39 | 3,055,065 | 2,909,105 | 2,791,674 |
| BC1-40 | 4,646,956 | 3,886,997 | 3,377,862 |
| BC1-41 | 2,150,674 | 2,053,229 | 1,874,913 |
| BC1-42 | 3,137,926 | 2,991,230 | 2,910,466 |
| BC1-43 | 3,512,500 | 3,316,277 | 3,121,469 |
| BC1-44 | 1,595,470 | 1,455,698 | 1,377,780 |
| BC1-45 | 2,699,087 | 2,435,769 | 2,252,135 |
| BC1-46 | 2,590,895 | 2,202,824 | 2,044,786 |
| BC1-47 | 3,499,710 | 3,158,887 | 3,076,829 |
| BC1-48 | 4,905,094 | 3,945,982 | 3,779,891 |
| BC1-49 | 5,947,249 | 4,743,836 | 4,622,071 |
| BC1-50 | 1,378,135 | 1,331,165 | 1,279,284 |
| BC1-51 | 4,801,319 | 3,939,907 | 3,224,029 |
| BC1-52 | 1,883,843 | 1,583,530 | 1,522,119 |
| BC1-53 | 2,056,402 | 1,868,408 | 1,777,120 |
| BC1-54 | 2,422,367 | 1,998,356 | 1,846,610 |
| BC1-55 | 1,563,606 | 1,429,858 | 1,365,399 |
| BC1-56 | 4,564,556 | 3,766,313 | 3,532,643 |

|        |           |           |           |
|--------|-----------|-----------|-----------|
| BC1-57 | 2,949,176 | 2,433,105 | 2,136,350 |
| BC1-58 | 2,494,319 | 2,067,635 | 1,932,893 |
| BC1-59 | 1,878,097 | 1,563,555 | 1,488,978 |
| BC1-60 | 2,174,417 | 1,810,510 | 1,683,894 |
| BC1-61 | 3,174,043 | 2,623,416 | 2,535,561 |
| BC1-62 | 3,517,366 | 3,137,330 | 3,024,328 |
| BC1-63 | 2,755,209 | 2,422,195 | 2,238,251 |
| BC1-64 | 3,960,245 | 3,256,687 | 3,161,817 |
| BC1-65 | 1,789,641 | 1,488,028 | 1,378,969 |
| BC1-66 | 2,242,581 | 1,982,444 | 1,814,655 |
| BC1-67 | 2,710,636 | 2,412,144 | 2,107,253 |
| BC1-68 | 4,620,221 | 3,762,223 | 3,680,671 |
| BC1-69 | 2,386,638 | 2,268,977 | 1,943,926 |
| BC1-70 | 2,696,934 | 2,433,137 | 2,334,215 |
| BC1-71 | 2,400,577 | 2,172,181 | 2,053,400 |
| BC1-72 | 2,430,482 | 2,191,865 | 1,979,403 |
| BC1-73 | 2,261,353 | 2,056,888 | 1,806,147 |
| BC1-74 | 2,546,717 | 2,319,662 | 2,078,559 |
| BC1-75 | 2,170,241 | 1,954,852 | 1,756,512 |
| BC1-76 | 2,987,545 | 2,528,916 | 2,413,213 |
| BC1-77 | 2,004,686 | 1,662,240 | 1,584,347 |
| BC1-78 | 2,443,294 | 2,150,501 | 1,947,666 |
| BC1-79 | 2,128,773 | 1,927,355 | 1,704,673 |
| BC1-80 | 2,770,105 | 2,351,461 | 2,283,471 |
| BC1-81 | 2,346,818 | 2,120,658 | 1,988,021 |
| BC1-82 | 2,648,650 | 2,404,094 | 2,181,371 |
| BC1-83 | 3,142,760 | 2,616,723 | 2,482,026 |
| BC1-84 | 2,532,942 | 2,241,952 | 2,047,065 |
| BC1-85 | 2,214,624 | 1,893,257 | 1,756,219 |
| BC1-86 | 1,746,705 | 1,495,466 | 1,349,149 |
| BC1-87 | 2,404,755 | 2,174,885 | 1,900,289 |
| BC1-88 | 3,319,896 | 3,001,413 | 2,659,417 |
| BC1-89 | 2,638,450 | 2,354,452 | 2,047,420 |
| BC1-90 | 2,895,765 | 2,418,460 | 2,285,561 |
| BC1-91 | 4,116,228 | 3,461,170 | 3,027,746 |
| BC1-92 | 3,108,773 | 2,605,049 | 2,502,864 |
| BC1-93 | 2,348,927 | 2,122,463 | 2,044,779 |

|         |           |           |           |
|---------|-----------|-----------|-----------|
| BC1-94  | 1,115,665 | 1,060,846 | 991,555   |
| BC1-95  | 1,656,899 | 1,585,188 | 1,467,669 |
| BC1-96  | 1,506,389 | 1,432,451 | 1,208,388 |
| BC1-97  | 935,223   | 883,350   | 720,477   |
| BC1-98  | 1,623,808 | 1,540,617 | 1,349,125 |
| BC1-99  | 1,234,761 | 1,173,098 | 989,075   |
| BC1-100 | 1,467,639 | 1,403,101 | 1,276,567 |

**Supplementary Table S3 SNP numbers in the BC<sub>1</sub> mapping population.**

| <b>Samples</b> | <b>Total SNP</b> | <b>Homo SNP</b> | <b>Hetero SNP</b> | <b>Homo rate (%)</b> |
|----------------|------------------|-----------------|-------------------|----------------------|
| BC1-1          | 102705           | 21509           | 81196             | 20.94                |
| BC1-2          | 691490           | 406188          | 285302            | 58.74                |
| BC1-3          | 791851           | 439048          | 352803            | 55.45                |
| BC1-4          | 820263           | 432938          | 387325            | 52.78                |
| BC1-5          | 592821           | 346019          | 246802            | 58.37                |
| BC1-6          | 331553           | 161535          | 170018            | 48.72                |
| BC1-7          | 587000           | 289114          | 297886            | 49.25                |
| BC1-8          | 325778           | 174201          | 151577            | 53.47                |
| BC1-9          | 436447           | 171490          | 264957            | 39.29                |
| BC1-10         | 697847           | 396991          | 300856            | 56.89                |
| BC1-11         | 797857           | 416412          | 381445            | 52.19                |
| BC1-12         | 465236           | 228507          | 236729            | 49.12                |
| BC1-13         | 693805           | 302579          | 391226            | 43.61                |
| BC1-14         | 528046           | 286194          | 241852            | 54.20                |
| BC1-15         | 544401           | 247445          | 296956            | 45.45                |
| BC1-16         | 823597           | 441034          | 382563            | 53.55                |
| BC1-17         | 447281           | 243566          | 203715            | 54.45                |
| BC1-18         | 434954           | 203741          | 231213            | 46.84                |
| BC1-19         | 605053           | 287646          | 317407            | 47.54                |
| BC1-20         | 528773           | 244160          | 284613            | 46.17                |
| BC1-21         | 321450           | 137051          | 184399            | 42.64                |
| BC1-22         | 357512           | 163426          | 194086            | 45.71                |
| BC1-23         | 394077           | 191947          | 202130            | 48.71                |
| BC1-24         | 356489           | 164011          | 192478            | 46.01                |
| BC1-25         | 508790           | 295503          | 213287            | 58.08                |
| BC1-26         | 583232           | 299975          | 283257            | 51.43                |
| BC1-27         | 552667           | 265768          | 286899            | 48.09                |
| BC1-28         | 512226           | 262439          | 249787            | 51.24                |
| BC1-29         | 447721           | 210575          | 237146            | 47.03                |
| BC1-30         | 349103           | 140128          | 208975            | 40.14                |
| BC1-31         | 581917           | 257534          | 324383            | 44.26                |
| BC1-32         | 439627           | 198376          | 241251            | 45.12                |



|        |         |        |        |       |
|--------|---------|--------|--------|-------|
| BC1-33 | 626604  | 308180 | 318424 | 49.18 |
| BC1-34 | 673024  | 330115 | 342909 | 49.05 |
| BC1-35 | 501219  | 248448 | 252771 | 49.57 |
| BC1-36 | 363748  | 178941 | 184807 | 49.19 |
| BC1-37 | 911283  | 408873 | 502410 | 44.87 |
| BC1-38 | 486432  | 235120 | 251312 | 48.34 |
| BC1-39 | 640766  | 332310 | 308456 | 51.86 |
| BC1-40 | 751492  | 344085 | 407407 | 45.79 |
| BC1-41 | 457485  | 168696 | 288789 | 36.87 |
| BC1-42 | 682470  | 349799 | 332671 | 51.25 |
| BC1-43 | 698438  | 382506 | 315932 | 54.77 |
| BC1-44 | 272751  | 119605 | 153146 | 43.85 |
| BC1-45 | 493179  | 235633 | 257546 | 47.78 |
| BC1-46 | 433680  | 216365 | 217315 | 49.89 |
| BC1-47 | 807987  | 321198 | 486789 | 39.75 |
| BC1-48 | 894292  | 454978 | 439314 | 50.88 |
| BC1-49 | 1089693 | 594336 | 495357 | 54.54 |
| BC1-50 | 255852  | 105045 | 150807 | 41.06 |
| BC1-51 | 480835  | 215617 | 265218 | 44.84 |
| BC1-52 | 336371  | 133871 | 202500 | 39.80 |
| BC1-53 | 400397  | 181670 | 218727 | 45.37 |
| BC1-54 | 394035  | 195361 | 198674 | 49.58 |
| BC1-55 | 270567  | 121958 | 148609 | 45.07 |
| BC1-56 | 811326  | 410653 | 400673 | 50.62 |
| BC1-57 | 492907  | 208563 | 284344 | 42.31 |
| BC1-58 | 434355  | 198170 | 236185 | 45.62 |
| BC1-59 | 338507  | 117412 | 221095 | 34.69 |
| BC1-60 | 373851  | 149523 | 224328 | 40.00 |
| BC1-61 | 581284  | 291513 | 289771 | 50.15 |
| BC1-62 | 691276  | 401003 | 290273 | 58.01 |
| BC1-63 | 528670  | 245984 | 282686 | 46.53 |
| BC1-64 | 744414  | 381080 | 363334 | 51.19 |
| BC1-65 | 275682  | 115045 | 160637 | 41.73 |
| BC1-66 | 408050  | 192681 | 215369 | 47.22 |
| BC1-67 | 509492  | 224223 | 285269 | 44.01 |
| BC1-68 | 840624  | 495402 | 345222 | 58.93 |
| BC1-69 | 211504  | 77529  | 133975 | 36.66 |
| BC1-70 | 526912  | 277120 | 249792 | 52.59 |
| BC1-71 | 472125  | 210282 | 261843 | 44.54 |
| BC1-72 | 485986  | 193605 | 292381 | 39.84 |
| BC1-73 | 419804  | 172418 | 247386 | 41.07 |
| BC1-74 | 492293  | 210337 | 281956 | 42.73 |
| BC1-75 | 363204  | 189789 | 173415 | 52.25 |

|         |        |        |        |       |
|---------|--------|--------|--------|-------|
| BC1-76  | 515999 | 297088 | 218911 | 57.58 |
| BC1-77  | 306404 | 169483 | 136921 | 55.31 |
| BC1-78  | 449115 | 201498 | 247617 | 44.87 |
| BC1-79  | 389110 | 146439 | 242671 | 37.63 |
| BC1-80  | 512930 | 241982 | 270948 | 47.18 |
| BC1-81  | 464538 | 203811 | 260727 | 43.87 |
| BC1-82  | 521914 | 232086 | 289828 | 44.47 |
| BC1-83  | 551350 | 271175 | 280175 | 49.18 |
| BC1-84  | 469099 | 231274 | 237825 | 49.30 |
| BC1-85  | 367572 | 171103 | 196469 | 46.55 |
| BC1-86  | 269472 | 97892  | 171580 | 36.33 |
| BC1-87  | 448278 | 196507 | 251771 | 43.84 |
| BC1-88  | 613432 | 301640 | 311792 | 49.17 |
| BC1-89  | 510330 | 199690 | 310640 | 39.13 |
| BC1-90  | 547032 | 255421 | 291611 | 46.69 |
| BC1-91  | 713969 | 327191 | 386778 | 45.83 |
| BC1-92  | 570083 | 304370 | 265713 | 53.39 |
| BC1-93  | 433382 | 242954 | 190428 | 56.06 |
| BC1-94  | 179869 | 52985  | 126884 | 29.46 |
| BC1-95  | 323221 | 117045 | 206176 | 36.21 |
| BC1-96  | 236340 | 64079  | 172261 | 27.11 |
| BC1-97  | 80472  | 11788  | 68684  | 14.65 |
| BC1-98  | 256409 | 102016 | 154393 | 39.79 |
| BC1-99  | 143167 | 44350  | 98817  | 30.98 |
| BC1-100 | 243271 | 98495  | 144776 | 40.49 |

**Supplementary Table S4 Summary of SNP-based linkage maps.**

| <b>Chromosome/<br/>linkage group</b> | <b>Number of<br/>markers</b> | <b>Recombination<br/>length (cM)</b> | <b>Average length<br/>(cM)</b> |
|--------------------------------------|------------------------------|--------------------------------------|--------------------------------|
| 1                                    | 92                           | 148.12                               | 1.61                           |
| 2                                    | 283                          | 177.66                               | 0.63                           |
| 3                                    | 388                          | 194.49                               | 0.50                           |
| 4                                    | 381                          | 146.47                               | 0.38                           |
| 5                                    | 299                          | 141.97                               | 0.47                           |
| 6                                    | 411                          | 202.01                               | 0.49                           |
| 7                                    | 343                          | 192.22                               | 0.56                           |
| 8                                    | 343                          | 158.30                               | 0.46                           |
| 9                                    | 393                          | 127.77                               | 0.33                           |
| 10                                   | 456                          | 191.88                               | 0.42                           |
| 11                                   | 387                          | 180.41                               | 0.47                           |
| 12                                   | 428                          | 153.89                               | 0.36                           |
| 13                                   | 381                          | 159.44                               | 0.42                           |
| 14                                   | 323                          | 240.88                               | 0.75                           |

|       |      |         |      |
|-------|------|---------|------|
| 15    | 554  | 254.83  | 0.46 |
| 16    | 146  | 119.55  | 0.82 |
| 17    | 498  | 213.04  | 0.43 |
| 18    | 400  | 194.48  | 0.49 |
| 19    | 255  | 230.75  | 0.90 |
| 20    | 250  | 119.84  | 0.48 |
| 21    | 362  | 157.46  | 0.43 |
| 22    | 310  | 112.31  | 0.36 |
| 23    | 470  | 188.45  | 0.40 |
| 24    | 378  | 192.98  | 0.51 |
| 25    | 361  | 114.39  | 0.32 |
| 26    | 259  | 123.86  | 0.48 |
| 27    | 239  | 143.53  | 0.60 |
| 28    | 242  | 183.99  | 0.76 |
| Total | 9632 | 4764.96 | 0.49 |

**Supplementary Table S5 Putative genes within QTL regions and expression profiles.** The gene\_IDs were retrieved from Silkbase (<http://silkbases.ab.a.u-tokyo.ac.jp/>) and SilkDB v2.0 (<http://silkworm.genomics.org.cn/>). The genes exhibiting a signal of artificial selection are shown in red. Functional annotation was performed via BLAST searches against the nr database (<https://www.ncbi.nlm.nih.gov/>) and PFAM (<http://pfam.xfam.org/>) with a threshold  $E$  value of  $\leq 1e-5$ . In the developmental transcriptome of fifth-instar larvae between the domestic and wild silkworms, the expression levels of DEGs are also shown in red in the domestic silkworm. The transcription levels of all the putative genes in the various tissues on day 3 of the fifth-instar larvae were retrieved from NCBI Sequence Read Archive database (Accession number PRJNA284192). Br, brain; ASG, anterior silk gland; AMMSG, anterior section of middle silk gland; MMSG, middle section of middle silk gland; PMSG, posterior section of middle silk gland; PSG, posterior silk gland.

**Supplementary Table S6 Candidate genes within regions of selective sweeps co-localizing with QTLs.** The signals of a selective sweep were identified based on thresholds of  $F_{ST} > 0.4514$  and  $\theta_{\pi}$  ratio  $< 0.1835$ . Gene shown in red was also identified as candidate with signal of selective sweep in a previous study<sup>1</sup>.

| Gene_ID in SilkBase  | Gene_ID in SilkDB v2.0 | QTL    | Chr. | Scaffold | Start   | End     |
|----------------------|------------------------|--------|------|----------|---------|---------|
| KWMTBOMO04947        | BGIBMGA007997          | qtl1-1 | 9    | nscf2889 | 2170421 | 2171420 |
| <b>KWMTBOMO04927</b> | <b>BGIBMGA008005</b>   | qtl1-1 | 9    | nscf2889 | 1770361 | 1770860 |
| KWMTBOMO04918        | BGIBMGA008009          | qtl1-1 | 9    | nscf2889 | 1437434 | 1437850 |
| KWMTBOMO04917        | BGIBMGA008010          | qtl1-1 | 9    | nscf2889 | 1423351 | 1423850 |
| KWMTBOMO04914        | BGIBMGA008011          | qtl1-1 | 9    | nscf2889 | 1387851 | 1388850 |
| KWMTBOMO04915        | BGIBMGA008073          | qtl1-1 | 9    | nscf2889 | 1392851 | 1393350 |

|               |               |               |    |           |          |          |
|---------------|---------------|---------------|----|-----------|----------|----------|
| KWMTBOMO04915 | BGIBMGA008073 | qtl1-1        | 9  | nscaf2889 | 1394351  | 1394850  |
| KWMTBOMO15675 | BGIBMGA002295 | qtl1-3        | 26 | nscaf2330 | 509511   | 510010   |
| KWMTBOMO15678 | BGIBMGA002280 | qtl1-3        | 26 | nscaf2330 | 714061   | 714560   |
| KWMTBOMO15678 | BGIBMGA002280 | qtl1-3        | 26 | nscaf2330 | 714561   | 715060   |
| KWMTBOMO00426 | BGIBMGA000486 | qtl2-1        | 1  | nscaf1690 | 7360451  | 7360950  |
| KWMTBOMO00426 | BGIBMGA000486 | qtl2-1        | 1  | nscaf1690 | 7360951  | 7361450  |
| KWMTBOMO00426 | BGIBMGA000486 | qtl2-1        | 1  | nscaf1690 | 7361451  | 7361950  |
| KWMTBOMO00426 | BGIBMGA000486 | qtl2-1        | 1  | nscaf1690 | 7361951  | 7362450  |
| KWMTBOMO00380 | BGIBMGA000511 | qtl2-1        | 1  | nscaf1690 | 6146331  | 6146830  |
| KWMTBOMO00440 | BGIBMGA000748 | qtl2-1/qtl4-1 | 1  | nscaf1690 | 7831691  | 7832190  |
| KWMTBOMO13522 | BGIBMGA001310 | qtl2-3        | 23 | nscaf1962 | 250571   | 251070   |
| KWMTBOMO07656 | BGIBMGA000854 | qtl3-1        | 13 | nscaf1898 | 14347381 | 14347880 |
| KWMTBOMO12920 | BGIBMGA000225 | qtl4-3        | 22 | nscaf1681 | 7359951  | 7360450  |

**Supplementary Table S7 qPCR primer sequences and annealing temperatures.** *RpL3* sequence was retrieved from GenBank under accession number NM\_001043661.

| Accession number/<br>gene name | Forward and reverse primers (5'-3')                  | Length of<br>amplificon (bp) | Anneal<br>temperature<br>(°C) |
|--------------------------------|------------------------------------------------------|------------------------------|-------------------------------|
| <i>KWMTBOMO12906</i>           | CGGAGGCTACAGAAGCAGATAAT<br>TTTAGTAACCAAAAATACAGCATCG | 191                          | 53                            |
| <i>KWMTBOMO04917</i>           | GCATATCTTCAGGCACAACG<br>CATCAACAAAAGTTAAAGCTCCA      | 176                          | 52                            |
| <i>RpL3</i>                    | CGGTGTTGTTGGATACATTGAG<br>GCTCATCCTGCCATTCTTACT      | 161                          | 55                            |

**Supplementary Table S8 miRNAs in QTL regions and potential targets encoding silk fibroin proteins.** The miRNAs were retrieved from a previous study, which were expressed in the fifth-instar posterior silk gland of the domestic silkworm<sup>2</sup>.

| miRNA            | Target gene | miRNA            | Target gene |
|------------------|-------------|------------------|-------------|
| <b>qtl1-2</b>    |             | bmo-miR-P939-5p  |             |
| bmo-miR-P499-5p  |             | bmo-miR-P944-5p  |             |
| bmo-miR-P1017-5p |             | <b>qtl2-2</b>    |             |
| bmo-miR-P915-5p  |             | bmo-miR-P886-5p  |             |
| <b>qtl1-3</b>    |             | bmo-miR-P325-3p  |             |
| bmo-miR-P1487-3p |             | bmo-miR-P294-3p  |             |
| bmo-miR-P1298-3p |             | <b>qtl2-3</b>    |             |
| <b>qtl2-1</b>    |             | bmo-miR-P228-3p  |             |
| bmo-miR-P009-3p  | P25         | bmo-miR-P1466-3p |             |

|                  |     |                  |     |
|------------------|-----|------------------|-----|
| bmo-miR-P009-5p  |     | <b>qtl2-4</b>    |     |
| bmo-miR-P020-3p  |     | bmo-miR-P1192-5p |     |
| bmo-miR-P020-5p  |     | <b>qtl3-1</b>    |     |
| bmo-miR-P054-3p  |     | bmo-miR-P723-3p  |     |
| bmo-miR-P054-5p  |     | <b>qtl4-1</b>    |     |
| bmo-miR-P062-3p  |     | bmo-miR-P062-3p  |     |
| bmo-miR-P100-3p  |     | bmo-miR-P1416-3p | P25 |
| bmo-miR-P1147-5p |     | bmo-miR-P786-3p  |     |
| bmo-miR-P1230-5p |     | bmo-miR-P939-5p  |     |
| bmo-miR-P1306-3p |     | bmo-miR-P1147-5p |     |
| bmo-miR-P1326-3p |     | bmo-miR-P330-3p  |     |
| bmo-miR-P1416-3p | P25 | bmo-miR-P623-5p  |     |
| bmo-miR-P1453-3p |     | bmo-miR-P1230-5p |     |
| bmo-miR-P1481-3p |     | bmo-miR-P009-5p  |     |
| bmo-miR-P330-3p  |     | bmo-miR-P009-3p  | P25 |
| bmo-miR-P343-3p  |     | bmo-miR-P1481-3p |     |
| bmo-miR-P350-5p  |     | <b>qtl4-2</b>    |     |
| bmo-miR-P490-5p  |     | bmo-miR-P1415-3p |     |
| bmo-miR-P581-5p  | P25 | bmo-miR-P953-5p  |     |
| bmo-miR-P623-5p  |     | <b>qtl4-3</b>    |     |
| bmo-miR-P786-3p  |     | bmo-miR-P1415-3p |     |
| bmo-miR-P858-5p  |     | bmo-miR-P953-5p  |     |

---

## References

1. Xia, Q. *et al.* Complete resequencing of 40 genomes reveals domestication events and genes in silkworm (*Bombyx*). *Science* 326, 433-436 (2009).
2. Li, J. *et al.* MicroRNA expression profiling of the fifth-instar posterior silk gland of *Bombyx mori*. *BMC Genomics* 15, 410; [10.1186/1471-2164-15-410](https://doi.org/10.1186/1471-2164-15-410) (2014).
